# Supplementary material
Source: PubMed Central journal article supplement (PMC6314132)
Supplement: supp_RA118.004142_138380_2_supp_223920_ph4b95.pdf [file supp_RA118.004142_138380_2_supp_223920_ph4b95.pdf]

## Supporting information

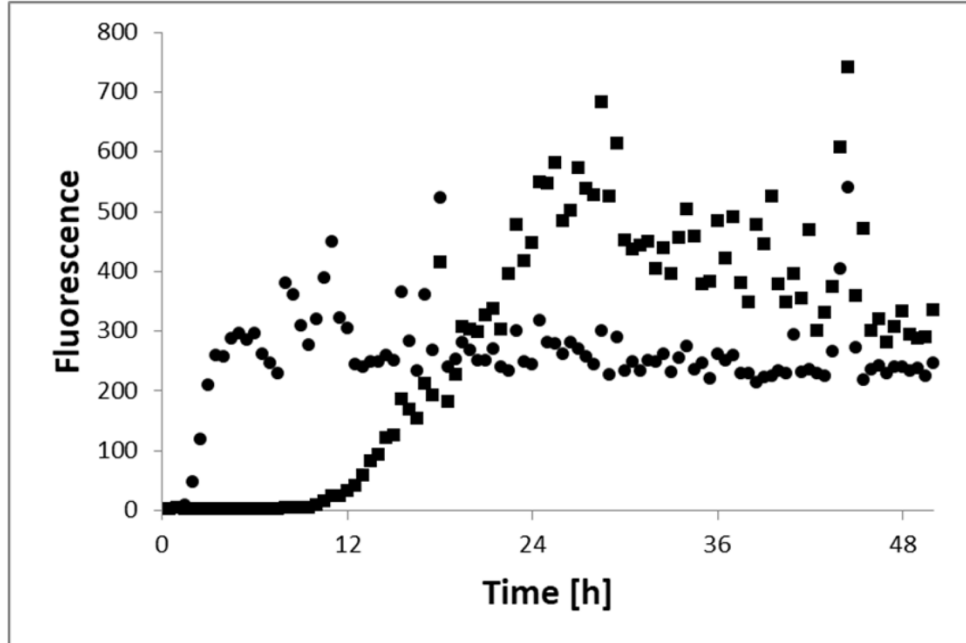

**Figure S1.** ThT fluorescence of VL2-8-J1 in acidic (circles) and neutral pH (squares). ThT fluorescence was measured in acidic conditions, 50 mM AcOH/AcNa pH 4, 150 mM NaCl, or in neutral conditions, 50 mM  $\text{PO}_4\text{H}_2\text{Na}/\text{PO}_4\text{HNa}_2$  pH 7.4, 150 mM NaCl.
